# Supplementary material
Source: PubMed Central journal article supplement (PMC6120659)

**Fig.1E**

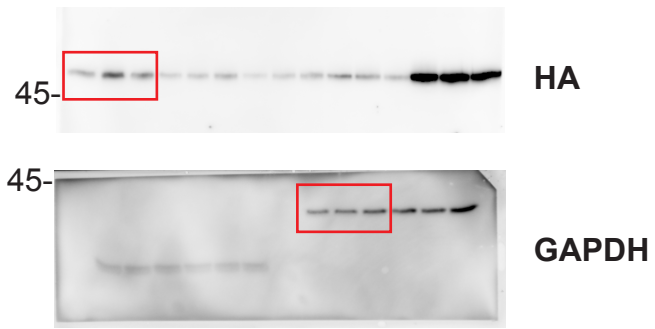

Supplement: EMBJ-37-e99259-s003.pdf [file EMBJ-37-e99259-s003.pdf]

**Fig.2A**

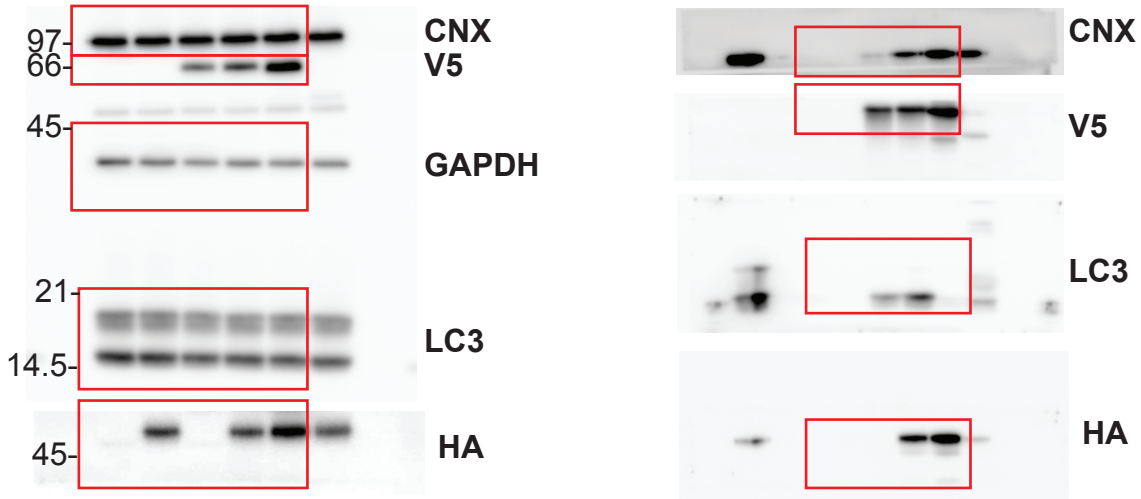

**Fig.2I**

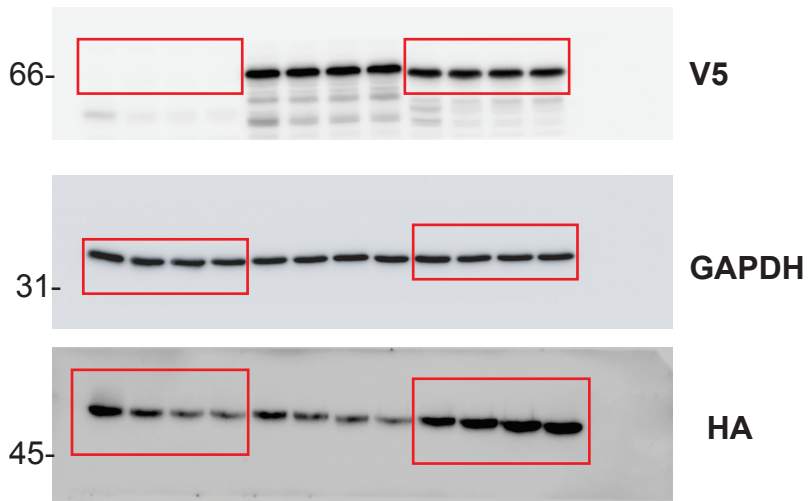

Supplement: EMBJ-37-e99259-s004.pdf [file EMBJ-37-e99259-s004.pdf]

**Fig.3A**

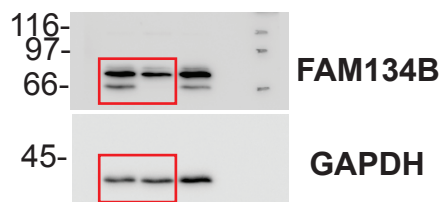

**Fig.3B**

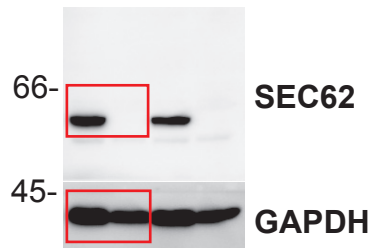

Supplement: EMBJ-37-e99259-s005.pdf [file EMBJ-37-e99259-s005.pdf]

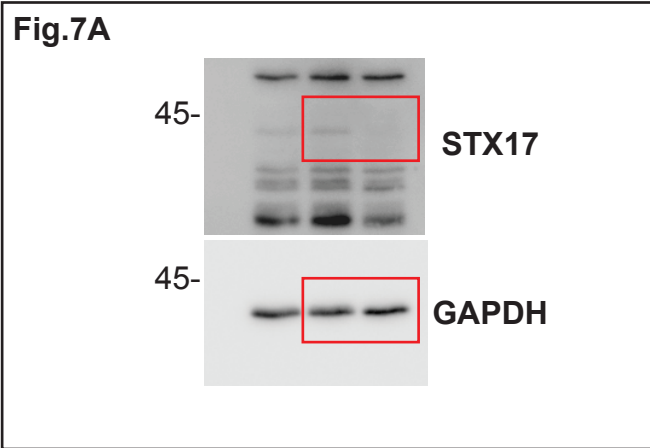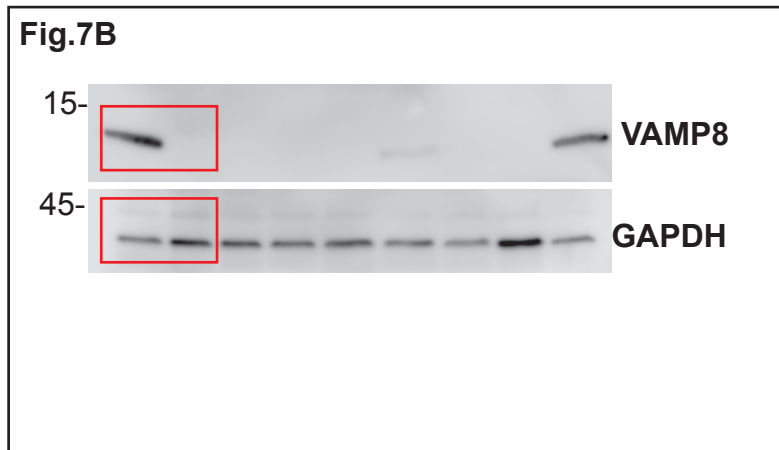

Supplement: EMBJ-37-e99259-s006.pdf [file EMBJ-37-e99259-s006.pdf]
